# Supplementary material
Source: Research Square preprint supplement (doi:10.21203/rs.3.rs-8715723/v1)
Supplement: Supplementary file 1 [file b1059b0639172bfa08219cbf.docx]

S1 Table

Definition and Assessment of Frailty Index Variables

| Variable | Scoring | |
| --- | --- | --- |
| Cognition  1. Experience confusion/memory problems Dependence | Yes = 1, No = 0 | |
| 2. Managing money | Difﬁculty = 1, No Difﬁculty = 0 | |
| 3. Stooping, crouching, kneeling | Difﬁculty = 1, No Difﬁculty = 0 | |
| 4. Lifting or carrying | Difﬁculty = 1, No Difﬁculty = 0 | |
| 5. House chore | Difﬁculty = 1, No Difﬁculty = 0 | |
| 6. Preparing meals | Difﬁculty = 1, No Difﬁculty = 0 | |
| 7. Standing up from armless chair | Difﬁculty = 1, No Difﬁculty = 0 | |
| 8. Getting in and out of bed difﬁculty | Difﬁculty = 1, No Difﬁculty = 0 | |
| 9. Using fork, knife, drinking from cup | Difﬁculty = 1, No Difﬁculty = 0 | |
| 10. Dressing yourself | Difﬁculty = 1, No Difﬁculty = 0 | |
| 11. Standing for long periods difﬁculty | Difﬁculty = 1, No Difﬁculty = 0 | |
| 12. Grasp/holding small objects | Difﬁculty = 1, No Difﬁculty = 0 | |
| 13. Attending social event | Difﬁculty = 1, No Difﬁculty = 0 | |
| 14. Push or pull large objects | Difﬁculty = 1, No Difﬁculty = 0 | |
| 15. Walking for a quarter mile difﬁculty | Difﬁculty = 1, No Difﬁculty = 0 | |
| 16. Walking up 10 steps difﬁculty Depressive Symptoms | Difﬁculty = 1, No Difﬁculty = 0 | |
| 17. Have little interest in doing things | Nearly every day = 1, More than half the days = 0.66, Several days = 0.33, Not at all = 0 | |
| 18. Feeling down, depressed, or hopeless | Nearly every day = 1, More than half the days = 0.66, Several days = 0.33, Not at all = 0 | |
| 19. Trouble sleeping or sleeping too much | Nearly every day = 1, More than half the days = 0.66, Several days = 0.33, Not at all = 0 | |
| 20. Feeling tired or having little energy | Nearly every day = 1, More than half the days = 0.66, Several days = 0.33, Not at all = 0 | |
| 21. Poor appetite or overeating | Nearly every day = 1, More than half the days = 0.66, Several days = 0.33, Not at all = 0 | |
| 22. Feeling bad about yourself | Nearly every day = 1, More than half the days = 0.66, Several days = 0.33, Not at all = 0 | |
| 23. Trouble concentrating on things Comorbidities | Nearly every day = 1, More than half the days = 0.66, Several days = 0.33, Not at all = 0 | |
| 24. Arthritis | Yes = 1, Suspect = 0.5 No = 0 | |
| 25. Thyroid problems | Yes = 1, Suspect = 0.5 No = 0 | |
| 26. Chronic bronchitis | Yes = 1, Suspect = 0.5 No = 0 | |
| 27. Cancer | Yes = 1, Suspect = 0.5 No = 0 | |
| 28. Congestive heart failure | Yes = 1, Suspect = 0.5 No = 0 | |
| 29. Coronary heart disease | Yes = 1, Suspect = 0.5 No = 0 | |
| 30. Angina | Yes = 1, Suspect = 0.5 No = 0 | |
| 31. Heart attack | Yes = 1, Suspect = 0.5 No = 0 | |
| 32. Stroke | Yes = 1, Suspect = 0.5 No = 0 | |
| 33. Blood pressure | Yes = 1, Suspect = 0.5 No = 0 | |
| 34. Diabetes | Yes = 1, Suspect = 0.5 No = 0 | |
| 35. weak/failing kidneys | Yes = 1, Suspect = 0.5 No = 0 | |
| 36. Urinary Leakage  Hospital Utilization and Access to Care | Yes = 1, Suspect = 0.5 No = 0 | |
| 37. Self-rated health | Fair, poor = 1, Excellent, Very good, good = 0 | |
| 38. Health now compared with 1 year ago | Worse = 1, About the same, better = 0 | |
| 39. Overnight hospital patient in past year | Yes = 1, No = 0 | |
| 40. Frequency of health care use during past year | None = 0, 1-5 = 0,5, More than 5 = 1 | |
| 41. Number of prescribed medications Physical Performance and Anthropometry | None = 0, 1-4 = 0.5, 5 and more = 1 | |
| 42. Body mass index | <18.5, ≥30 = 1   1. <30 = 0.5 2. 18.5-25 = 0 | |
| 43. Handgrip strength | MALE:  For BMI ≤ 24, GS ≤ 29  For BMI 24.1-28, GS ≤ 30  For BMI >28, GS ≤ 32 = 1 | FEMALE  For BMI ≤ 23, GS ≤ 17  For BMI 23.1-26, GS ≤ 17.3  For BMI 26.1-29, GS ≤ 18  For BMI>29, GS ≤ 21 = 1 |
| Laboratory Values |  | |
| 44. Red blood cell count (million cells/μL) | 0%-5.7%=0,>5.7%=1 F:4.2-5.4 = 0, Other = 1 | |
| 45. Red blood cell count (million cells/μL) | M: 4.7-6.1 = 0, Other = 1 F: 12-16 = 0, Other = 1 | |
| 46. Hemoglobin (g/dL) | M: 13.5-18 = 0, Other = 1 | |
| 47. Red cell distribution width (%) | 11.6-14.6 = 0, Other = 1 | |
| 48. Lymphocyte percent (%) | 20-40 = 0, Other = 1 | |
| 49. Segmented neutrophils percent (%) | 40-80 = 0, Other = 1 | |
